# Supplementary material for: SARS-CoV-2 Impact on Red Blood Cell Morphology
Source: Preprints.org preprint supplement (doi:10.20944/preprints202310.0194.v1), 2023-10-04
Supplement: Supplementary file 4 [file supl erythrocyte types.xls]

## Sheet: control donor
			cells quantity
	donor1	donor2	donor3	donor4	donor5	donor6
Normocytes	1612	694	907	1271	1059	2002
Echinocytes	7	46	0	11	3	15
Acanthocytes	1	1	0	0	0	1
Stomatocytes	8	8	18	29	64	64
Ovalocytes	6	11	2	5	7	33
Spherocytes	13	3	30	67	208	141
Schistocyte	0	0	0	5	0	1
Degmacytes	0	3	0	0	7	0
Dacryocytes	0	3	1	2	0	6
Knizocytes	2	19	1	5	5	9
																					Sars

## Sheet: COVID-19 patientes
	cells quantity
	Sars11	sars10	sars13	sars16	sars17
Normocytes	1146	1772	757	432	761
Echinocytes	10	32	26	378	138
Acanthocytes	3	4	1	2	5
Stomatocytes	50	34	8	8	9
Ovalocytes	39	3	10	2	36
Spherocytes	16	9	1	3	0
Schistocyte	5	3	2	0	0
Degmacytes	4	1	3	1	3
Dacryocytes	6	2	1	0	2
Knizocytes	10	14	19	9	6
